# Supplementary material for: Development of a Screening Method for Sulfamethoxazole in Environmental Water by Digital Colorimetry Using a Mobile Device
Source: MDPI journal article supplement (doi:10.3390/chemosensors10010025), 2022-01-07
Supplement: s1 [file s1]

# Development of a Screening Method for Sulfamethoxazole in Environmental Water by Digital Colorimetry Using a Mobile Device

Patrícia S. Peixoto <sup>1</sup>, Pedro H. Carvalho <sup>2</sup>, Ana Machado <sup>3,4</sup>, Luisa Barreiros <sup>1</sup>, Adriano A. Bordalo <sup>3,4</sup>,  
Hélder P. Oliveira <sup>2,5</sup> and Marcela A. Segundo <sup>1,\*</sup>

<sup>1</sup> LAQV, REQUIMTE, Faculty of Pharmacy, University of Porto, 4050-313 Porto, Portugal; patriciaspeixoto@gmail.com (P.S.P.); lbarreiros@ff.up.pt (L.B.)

<sup>2</sup> INESC TEC—Institute for Systems and Computer Engineering, Technology and Science, 4200-465 Porto, Portugal; phmq.carvalho@gmail.com (P.H.C.); helder.f.oliveira@inesctec.pt (H.P.O.)

<sup>3</sup> Department of Population Studies, ICBAS, Instituto de Ciências Biomédicas Abel Salazar, Universidade do Porto, 4050-313 Porto, Portugal; ammachado@icbas.up.pt (A.M.); bordalo@icbas.up.pt (A.A.B.)

<sup>4</sup> CIIMAR—Interdisciplinary Centre of Marine and Environmental Research, 4450-208 Matosinhos, Portugal

<sup>5</sup> Faculty of Sciences, University of Porto, 4169-007 Porto, Portugal

\* Correspondence: msegundo@ff.up.pt; Tel.: +351-220428676

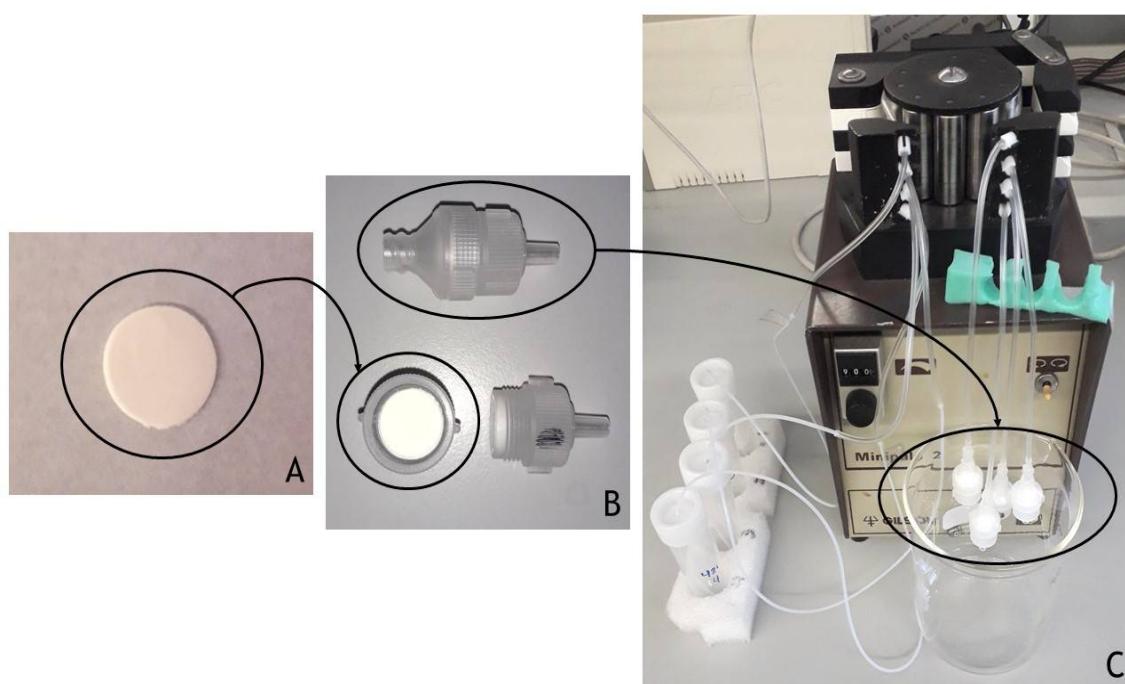

**Figure S1.** Experimental apparatus for solid-phase extraction performed in the laboratory (A. Extraction disk, B. Placement of disk in the holder, C. Flow set-up for SPE).

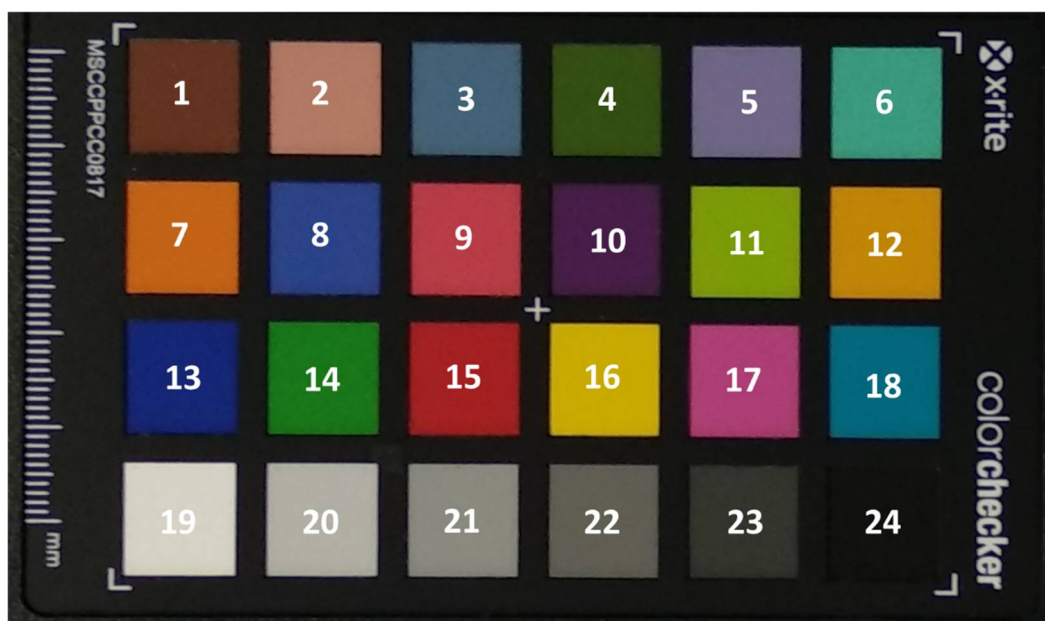

**Figure S2.** Detail of the color palette with numbers assigned to each patch.
